# Supplementary material for: In situ synthesis of ZnO–GO/CGH composites for visible light photocatalytic degradation of methylene blue
Source: Royal Society of Chemistry journal article supplement (doi:10.1039/c9ra09260a), 2019-01-01
Supplement: c9ra09260a1.pdf [file c9ra09260a1.pdf]

# Supporting Materials

1

2

## **In situ synthesis of ZnO–GO/CGH composites for visible light photocatalytic degradation of Methylene Blue**

5

6

7 Xiaoxuan Di<sup>1</sup>, Feng Guo<sup>1\*</sup>, Zihan Zhu<sup>1</sup>, Zhonghao Xu<sup>1</sup>, Ziqi Qian<sup>1</sup>, Qian Zhang<sup>1</sup>

8

9

10 <sup>1</sup>Key Laboratory of Industrial Ecology and Environmental Engineering (Ministry of  
11 Education), School of Ocean Science and Technology, Dalian University of  
12 Technology, Panjin 124221, China

13

14 (Email: 0411guofeng@dlut.edu.cn)

15

16

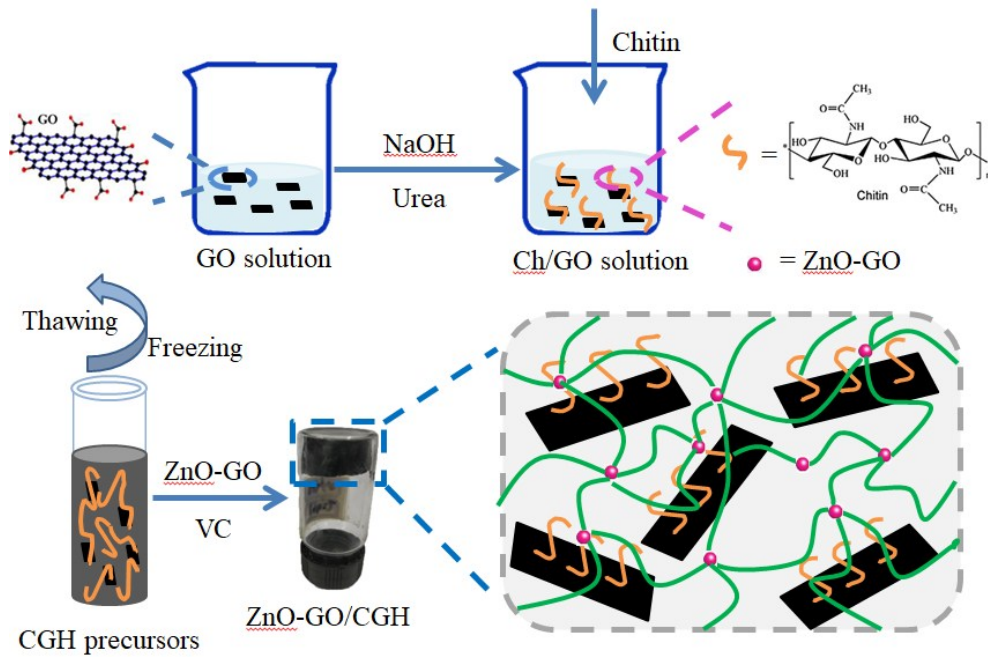

17

18 Scheme1. The synthesis route of ZnO-GO/CGH.

19

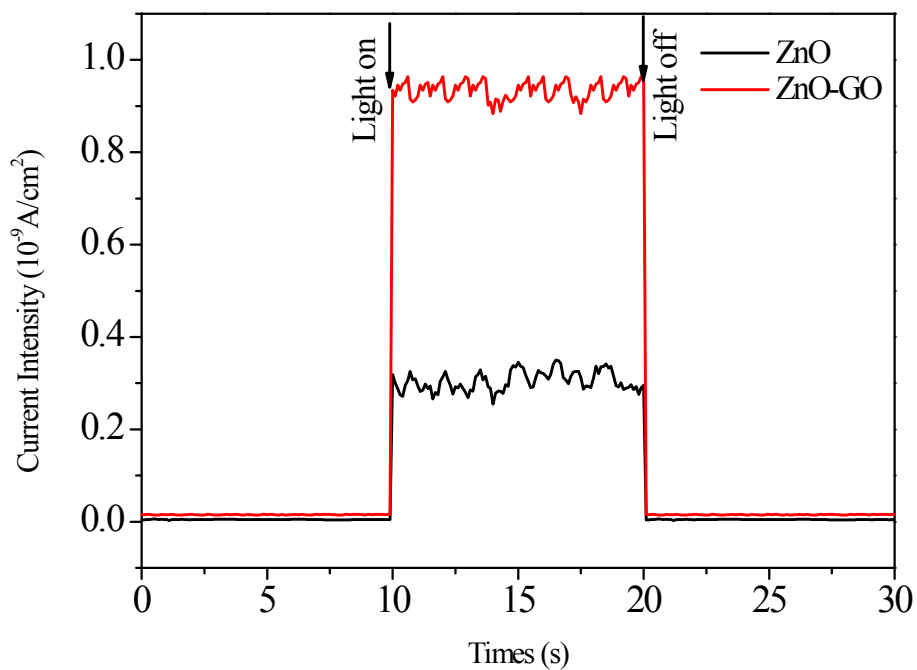

20

21 Figure S1. Photocurrent versus time (I-t) curves of the solar cell device based on ZnO  
22 and ZnO-GO composite in 0.5 M Na $_2$ SO $_4$  aqueous solution under visible light  
23 irradiation with applied potential of -0.1 V vs Ag/AgCl.

24

25

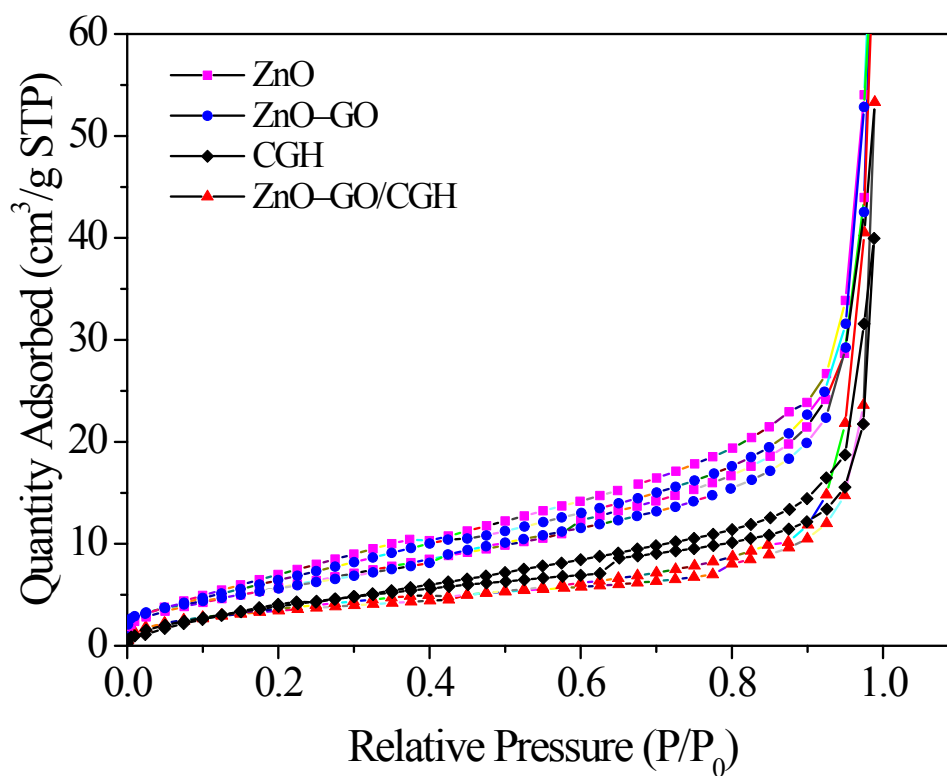

26

27 Figure S2. N<sub>2</sub> adsorption desorption curve and physical and chemical parameters of  
28 different adsorbent samples.

29

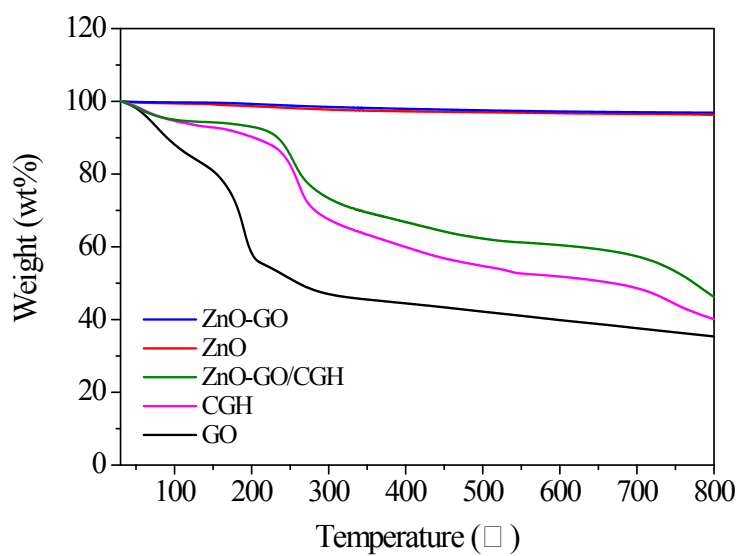

30

31 Figure S3. Thermal analysis (TGA) of GO, ZnO, ZnO-GO, CGH and ZnO-GO/CGH  
32 composites.

33

34

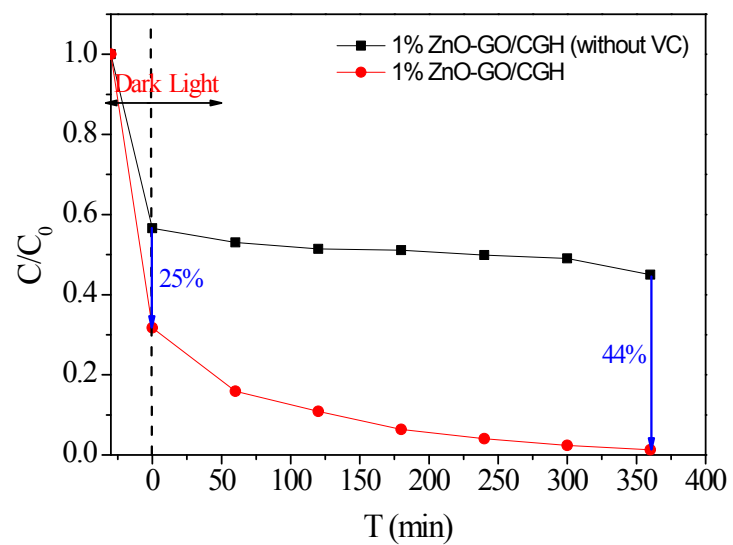

35

36 Figure S4. Effect of Vitamin C on photocatalytic performance of ZnO-GO/CGH  
37 composites.

38

39

40

41

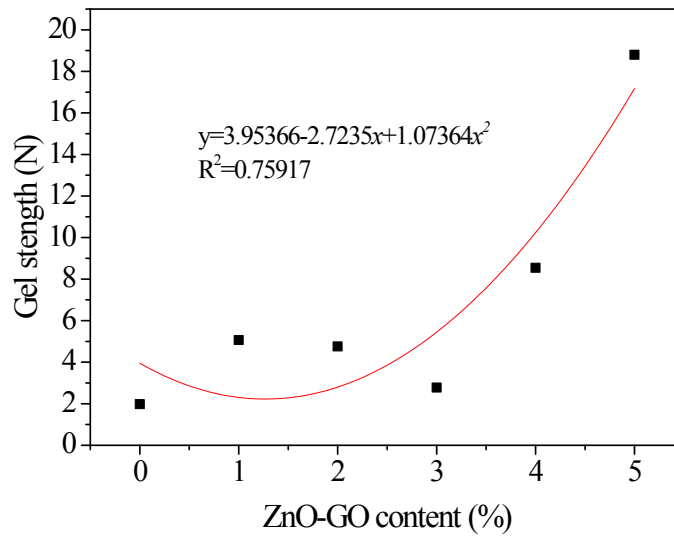

42

43 Figure S5. Maximum endurance of chitin graphene hydrogel doped with different  
44 ZnO-GO content.

45

46

47

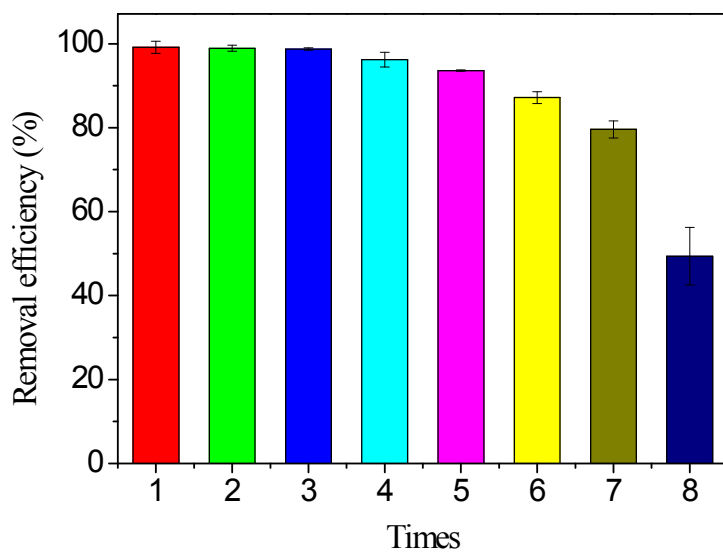

48

49 Figure S6. Cycling experiment for degradation of MB with 1% ZnO-GO/CGH ( $C_0$ , 30  
50  $\text{mg L}^{-1}$ ; catalyst dosage, 1.0 g/L).

51

52



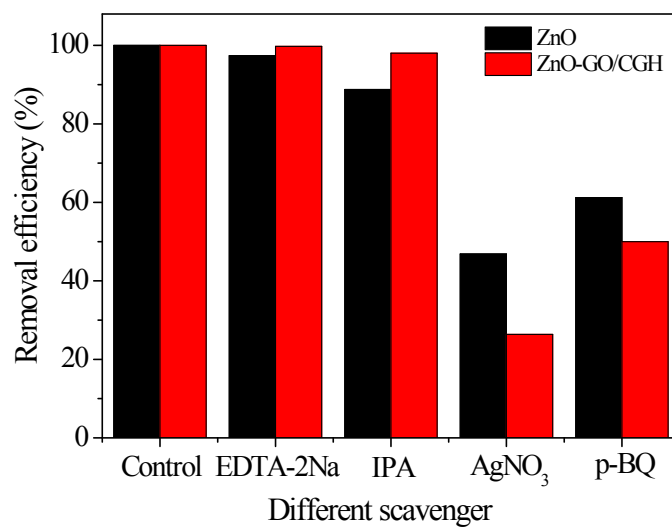

53

54 Figure S7. Change of MB photocatalytic degradation degree observed for 1%  
55 ZnO-GO /CGH under visible-light irradiation in the presence of various trapping  
56 agent

57

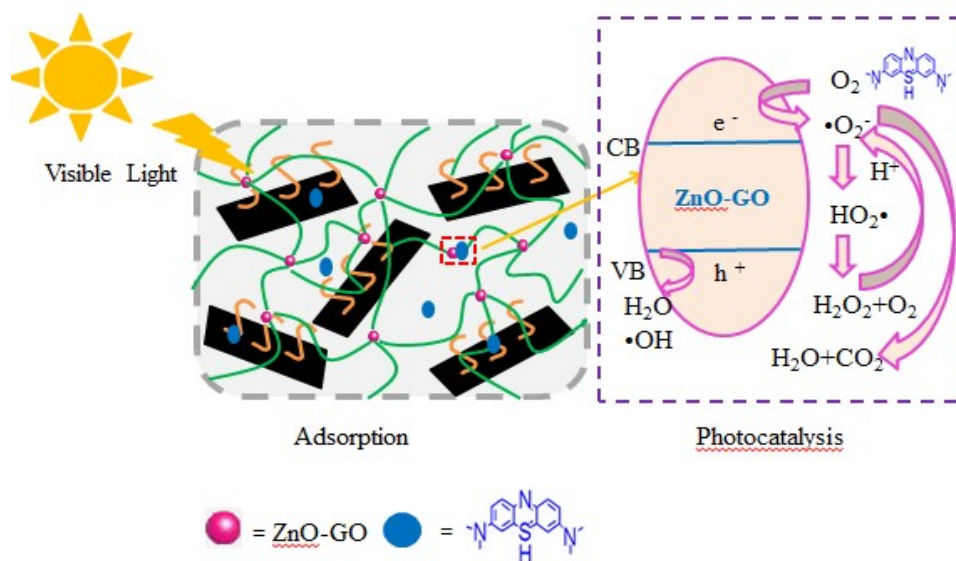

58

59 Figure S8. Schematic drawing illustrates the synergy of MB adsorption enrichment  
60 and photocatalytic degradation by ZnO-GO/CGH composite.

61

62

63

64

65

66 Table S1. Physical and chemical parameters of different adsorbent samples

| Sample     | $S_{BET}$<br>( $m^2/g$ ) | Pore Volume<br>( $cm^3/g$ ) | Pore Size<br>(nm) |
|------------|--------------------------|-----------------------------|-------------------|
| ZnO        | 28.08                    | 5.716                       | 1.052             |
| ZnO-GO     | 32.41                    | 6.039                       | 1.504             |
| CGH        | 9.952                    | 2.628                       | 1.034             |
| ZnO-GO/CGH | 18.76                    | 5.065                       | 1.283             |

67

68

69

70

71 Table S2. Kinetic parameters and correlation coefficients for the adsorption of MB on

72 CGH.

| Pseudo-first order model |                    |       | Pseudo-second order model |                                                  |                    |       |
|--------------------------|--------------------|-------|---------------------------|--------------------------------------------------|--------------------|-------|
| $K_1(\text{min}^{-1})$   | $q_e(\text{mg/g})$ | $R^2$ | $K_2$                     | $(g \cdot \text{mg}^{-1} \cdot \text{min}^{-1})$ | $q_e(\text{mg/g})$ | $R^2$ |
| 0.07588                  | 22.40904           | 0.99  | 0.01015                   |                                                  | 22.9042            | 0.999 |
|                          | 2                  |       |                           |                                                  | 6                  |       |

73
